# Supplementary material for: A facile method for monitoring sphingomyelin synthase activity in HeLa cells using liquid chromatography/mass spectrometry
Source: Royal Society of Chemistry journal article supplement (doi:10.1039/d4an00304g), 2024-01-01

Supporting information for

**A facile method for monitoring sphingomyelin synthase activity in HeLa cells using liquid chromatography/mass spectrometry**

Punith M.Sundaraswamy<sup>1#</sup>, Yusuke Minami<sup>2#</sup>, Jayashankar Jayaprakash<sup>1#</sup>, Siddabasave Gowda B. Gowda<sup>1,3\*</sup>, Hiroyuki Takatsu<sup>4</sup>, Divyavani Gowda<sup>3</sup>, Hye-Won Shin<sup>4</sup>, and Shu-Ping Hui<sup>3\*</sup>

1. Graduate School of Global Food Resources, Hokkaido University, Kita-9, Nishi-9, Kita-Ku, Sapporo 060-0809, Japan
2. Graduate School of Health Sciences, Hokkaido University, Kita-12, Nishi-5, Kita-ku, Sapporo 060-0812, Japan
3. Faculty of Health Sciences, Hokkaido University, Kita-12, Nishi-5, Kita-ku, Sapporo 060-0812, Japan
4. Graduate School of Pharmaceutical Sciences, Kyoto University, Kyoto 606-8501, Japan

#Equally contributing authors

\*Correspondences:

1. Siddabasave Gowda B. Gowda\*

Faculty of Health Sciences, Hokkaido University,  
Kita-12, Nishi-5, Kita-ku, Sapporo 060-0812, Japan.

E-mail: [gowda@gfr.hokudai.ac.jp](mailto:gowda@gfr.hokudai.ac.jp)

2. Shu-Ping Hui

Faculty of Health Sciences, Hokkaido University,  
Kita-12, Nishi-5, Kita-ku, Sapporo 060-0812, Japan.

E-mail: [keino@hs.hokudai.ac.jp](mailto:keino@hs.hokudai.ac.jp) Tel: +81-11-706-3693.

**Table S1.** Method validation for C6-Cer and C6-SM lipid species using cell lysates (n=5). LOD: limit of detection, LOQ: limit of quantification, RSD: relative standard deviation. Low concentration (Low): 5 fmol and High concentration (High): 50 fmol.

| Lipids | Detection limits |            | Extraction recovery (%) |       | Matrix effect (%) |      | Intra-day (RSD, %) |      | Inter-day (RSD, %) |      |
|--------|------------------|------------|-------------------------|-------|-------------------|------|--------------------|------|--------------------|------|
|        | LOD (fmol)       | LOQ (fmol) | Low                     | High  | Low               | High | Low                | High | Low                | High |
| C6-Cer | 0.05             | 0.5        | 105.8                   | 103.7 | 68.7              | 73.2 | 11.4               | 4.8  | 5.2                | 2.4  |
| C6-SM  | 0.05             | 0.5        | 120.5                   | 116.5 | 72.2              | 71.1 | 12.3               | 5.0  | 5.4                | 1.9  |

**Figure S1:** Production of C6-SM in control (HeLa), HeLa/SMS1, and HeLa/SMS2 over different incubation time at a protein concentration 0.1  $\mu\text{g}/\mu\text{L}$  (n=3).

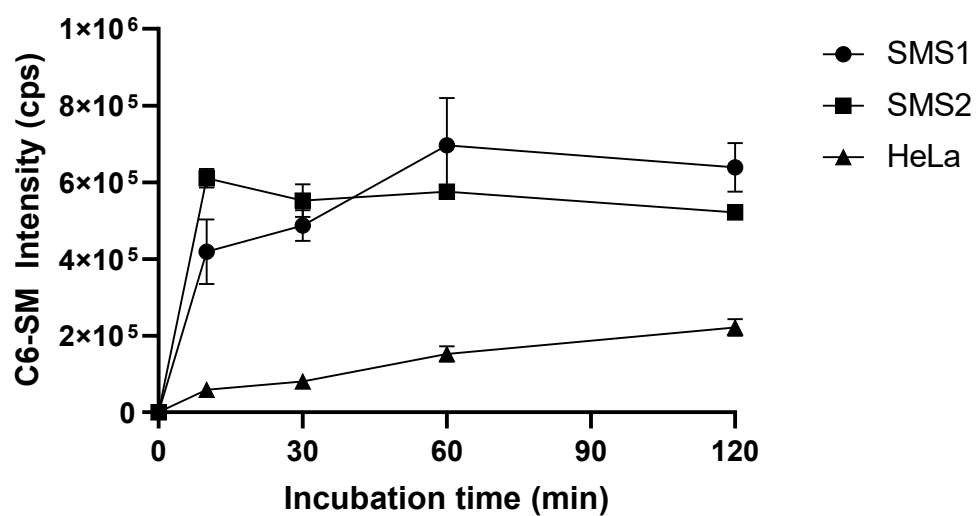

**Figure S2:** (A) Comparison of sequences of SMS1 and SMS2 (B) Predicted Local Distance Difference Test (p IDDT) score of SMS1 and SMS2.

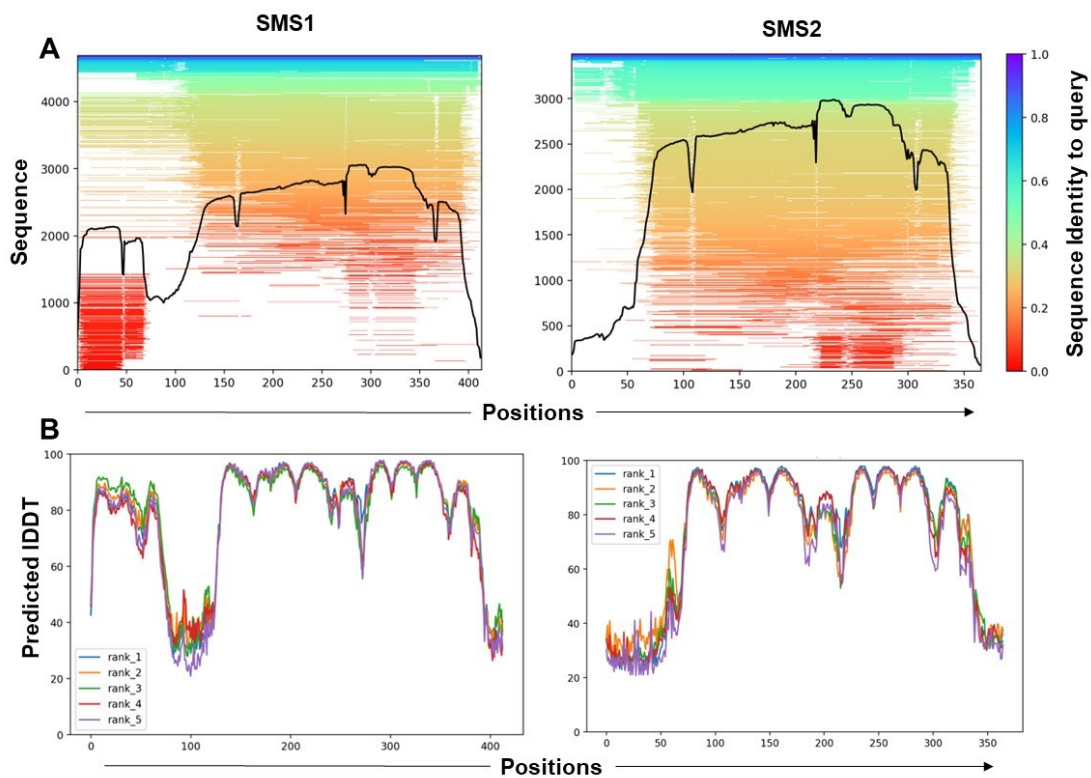

**Figure S3:** Root Mean Square Deviation (RMSD) of protein-ligand Complex of SMS1.

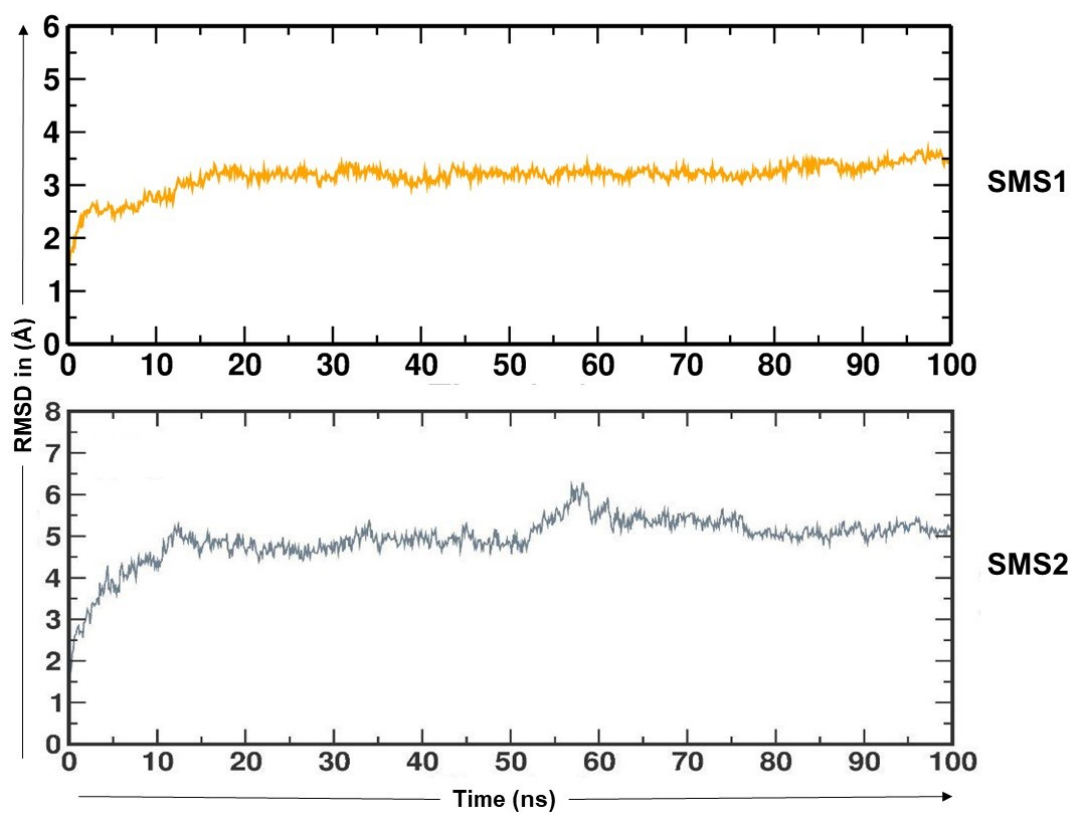

Supplement: d4an00304g1.pdf [file d4an00304g1.pdf]
